# Supplementary material for: Integrated Analysis of DNA Methylome and Transcriptome Reveals Epigenetic Regulation of CAM Photosynthesis in Pineapple
Source: Research Square preprint supplement (doi:10.21203/rs.3.rs-81495/v1), 2020-10-08
Supplement: Supplementary file 1 [file a236d9a7daed2a31efd9cf2f.xlsx]

## Sheet: Glycolysis Green vs White DMR
Supplemental Table 7 DMRs location and associated differential expression of CAM related glycolysis and gluconeogenesis genes.
Sample	Type	Chromosome	DMR Start	DMR End	Green meth	White meth	Associated gene name	Associated region	Strand	Gene Start	Gene End
4am	CG	LG02	17129874	17129973	0.584112	0.172078	Aco000731.v3	body	F	17117038	17130654
4am	CG	LG02	17131574	17131673	0.697183	0.285714	Aco000731.v3	dwonstream	F	17117038	17130654
4am	CG	LG07	11970898	11970997	0.345794	0.931818	Aco018378.v3	upstream	F	11971604	11981479
4pm	CG	LG07	11970957	11971056	0.375839	0.783784	Aco018378.v3	upstream	F	11971604	11981479
4am	CG	LG07	11970998	11971097	0.303371	0.871951	Aco018378.v3	upstream	F	11971604	11981479
10pm	CG	LG07	11971001	11971100	0.378788	0.903448	Aco018378.v3	upstream	F	11971604	11981479
4am	CG	LG07	11971098	11971197	0.4	0.95	Aco018378.v3	upstream	F	11971604	11981479
4am	CG	LG23	1987307	1987406	0.171548	0.593023	Aco007146.v3	dwonstream	R	1988940	1993967
10pm	CG	LG23	1989107	1989206	0.442308	0.015873	Aco007146.v3	body	R	1988940	1993967
10pm	CG	LG24	3919727	3919826	0.400763	0.852665	Aco020962.v3	upstream	F	3921744	3928761
10am	CG	LG24	3919753	3919852	0.435115	0.865248	Aco020962.v3	upstream	F	3921744	3928761
10am	CHG	LG01	20915588	20915687	0.586538	0.806122	Aco018596.v3	dwonstream	R	20916583	20922964
10am	CHG	LG01	4388488	4388587	0.495495	0.697248	Aco018422.v3	dwonstream	R	4389227	4405661
4pm	CHG	LG01	4403392	4403491	0.736842	0.52381	Aco018422.v3	body	R	4389227	4405661
4am	CHG	LG01	4404288	4404387	0.424419	0.198758	Aco018422.v3	body	R	4389227	4405661
10pm	CHG	LG05	6807429	6807528	0.430303	0.142857	Aco017741.v3	body	F	6806214	6814488
4am	CHG	LG05	6809878	6809977	0.241379	0.039823	Aco017741.v3	body	F	6806214	6814488
10pm	CHG	LG05	6814129	6814228	0.365079	0.582278	Aco017741.v3	body	F	6806214	6814488
10pm	CHG	LG05	6814229	6814328	0.422535	0.686047	Aco017741.v3	body	F	6806214	6814488
4pm	CHG	LG06	11142724	11142823	0.727273	0.509677	Aco002739.v3	dwonstream	R	11144420	11153659
4am	CHG	LG06	11155354	11155453	0.390351	0.635379	Aco002739.v3	upstream	R	11144420	11153659
4pm	CHG	LG07	11970057	11970156	0.903226	0.65625	Aco018378.v3	upstream	F	11971604	11981479
4am	CHG	LG07	11970898	11970997	0.293478	0.86087	Aco018378.v3	upstream	F	11971604	11981479
10pm	CHG	LG07	11970901	11971000	0.416667	0.858696	Aco018378.v3	upstream	F	11971604	11981479
4pm	CHG	LG07	11970957	11971056	0.240964	0.644444	Aco018378.v3	upstream	F	11971604	11981479
4am	CHG	LG07	11970998	11971097	0.259615	0.6875	Aco018378.v3	upstream	F	11971604	11981479
10pm	CHG	LG07	11971001	11971100	0.333333	0.762712	Aco018378.v3	upstream	F	11971604	11981479
4pm	CHG	LG07	11971057	11971156	0.571429	0.9	Aco018378.v3	upstream	F	11971604	11981479
4am	CHG	LG07	11978198	11978297	0.369942	0.0817308	Aco018378.v3	body	F	11971604	11981479
4am	CHG	LG11	9562143	9562242	0.295302	0.0814815	Aco005368.v3	body	R	9559458	9564245
10pm	CHG	LG11	9565904	9566003	0.422741	0.625506	Aco005368.v3	upstream	R	9559458	9564245
10pm	CHG	LG14	6572331	6572430	0.577236	0.25	Aco024987.v3	body	R	6567358	6588908
10pm	CHG	LG14	6572431	6572530	0.6	0.336364	Aco024987.v3	body	R	6567358	6588908
4am	CHG	LG14	6581312	6581411	0.61157	0.368421	Aco024987.v3	body	R	6567358	6588908
10pm	CHG	LG14	6581431	6581530	0.833333	0.598684	Aco024987.v3	body	R	6567358	6588908
4am	CHG	LG14	6585312	6585411	0.918367	0.698718	Aco024987.v3	body	R	6567358	6588908
4am	CHG	LG19	7832701	7832800	0.33913	0.609481	Aco008163.v3	upstream	R	7823200	7831853
10am	CHG	LG23	1987307	1987406	0.308642	0.8	Aco007146.v3	dwonstream	R	1988940	1993967
10am	CHG	LG23	1987907	1988006	0.486957	0.692913	Aco007146.v3	dwonstream	R	1988940	1993967
4am	CHG	LG23	3270507	3270606	0.698113	0.413043	Aco007306.v3	upstream	F	3270781	3275753
10am	CHG	LG24	3920553	3920652	0.66242	0.878453	Aco020962.v3	upstream	F	3921744	3928761
10pm	CHG	LG24	3920627	3920726	0.682979	0.886051	Aco020962.v3	upstream	F	3921744	3928761
4pm	CHG	LG24	3920645	3920744	0.667722	0.884615	Aco020962.v3	upstream	F	3921744	3928761
10pm	CHH	LG01	11877988	11878087	0.363537	0.247084	Aco011398.v3	upstream	F	11879508	11882360
10pm	CHH	LG01	20915588	20915687	0.622266	0.473734	Aco018596.v3	dwonstream	R	20916583	20922964
4am	CHH	LG01	20915623	20915722	0.652778	0.550758	Aco018596.v3	dwonstream	R	20916583	20922964
10pm	CHH	LG01	20915788	20915887	0.808743	0.510989	Aco018596.v3	dwonstream	R	20916583	20922964
4pm	CHH	LG01	20915792	20915891	0.681034	0.504673	Aco018596.v3	dwonstream	R	20916583	20922964
10am	CHH	LG01	20922988	20923087	0.356495	0.213974	Aco018596.v3	upstream	R	20916583	20922964
4pm	CHH	LG01	20922992	20923091	0.39821	0.22239	Aco018596.v3	upstream	R	20916583	20922964
10am	CHH	LG01	20923088	20923187	0.767273	0.6	Aco018596.v3	upstream	R	20916583	20922964
4pm	CHH	LG01	20923092	20923191	0.77551	0.624658	Aco018596.v3	upstream	R	20916583	20922964
4am	CHH	LG01	20923123	20923222	0.691489	0.444904	Aco018596.v3	upstream	R	20916583	20922964
10pm	CHH	LG01	20923188	20923287	0.465347	0.243161	Aco018596.v3	upstream	R	20916583	20922964
4pm	CHH	LG01	20923192	20923291	0.471716	0.253406	Aco018596.v3	upstream	R	20916583	20922964
4am	CHH	LG01	20923223	20923322	0.471739	0.287129	Aco018596.v3	upstream	R	20916583	20922964
10am	CHH	LG01	20923288	20923387	0.604396	0.459584	Aco018596.v3	upstream	R	20916583	20922964
4pm	CHH	LG01	20923292	20923391	0.683797	0.449767	Aco018596.v3	upstream	R	20916583	20922964
4am	CHH	LG01	20923323	20923422	0.617356	0.449464	Aco018596.v3	upstream	R	20916583	20922964
10pm	CHH	LG01	20923388	20923487	0.45721	0.346558	Aco018596.v3	upstream	R	20916583	20922964
4pm	CHH	LG01	20923392	20923491	0.404805	0.28464	Aco018596.v3	upstream	R	20916583	20922964
10pm	CHH	LG01	20924088	20924187	0.232365	0.119048	Aco018596.v3	upstream	R	20916583	20922964
4pm	CHH	LG01	20924092	20924191	0.275862	0.159292	Aco018596.v3	upstream	R	20916583	20922964
4am	CHH	LG01	20924123	20924222	0.240602	0.0934183	Aco018596.v3	upstream	R	20916583	20922964
10am	CHH	LG01	20924388	20924487	0.414433	0.235741	Aco018596.v3	upstream	R	20916583	20922964
4pm	CHH	LG01	20924492	20924591	0.298182	0.0855263	Aco018596.v3	upstream	R	20916583	20922964
10am	CHH	LG01	20924688	20924787	0.46384	0.724252	Aco018596.v3	upstream	R	20916583	20922964
4am	CHH	LG01	20924723	20924822	0.335677	0.200608	Aco018596.v3	upstream	R	20916583	20922964
10pm	CHH	LG01	20924888	20924987	0.414234	0.306223	Aco018596.v3	upstream	R	20916583	20922964
4am	CHH	LG01	20924923	20925022	0.451512	0.334027	Aco018596.v3	upstream	R	20916583	20922964
4am	CHH	LG01	23281223	23281322	0.287129	0.149502	Aco024201.v3	upstream	F	23281594	23284953
4pm	CHH	LG01	23281292	23281391	0.313761	0.150917	Aco024201.v3	upstream	F	23281594	23284953
4am	CHH	LG01	23281323	23281422	0.272171	0.158816	Aco024201.v3	upstream	F	23281594	23284953
4am	CHH	LG01	4387688	4387787	0.721973	0.550725	Aco018422.v3	dwonstream	R	4389227	4405661
4am	CHH	LG01	4387788	4387887	0.576687	0.374449	Aco018422.v3	dwonstream	R	4389227	4405661
10pm	CHH	LG01	4400788	4400887	0.222809	0.116613	Aco018422.v3	body	R	4389227	4405661
10pm	CHH	LG01	4403288	4403387	0.34589	0.196809	Aco018422.v3	body	R	4389227	4405661
4am	CHH	LG01	4403588	4403687	0.258112	0.148837	Aco018422.v3	body	R	4389227	4405661
10am	CHH	LG01	4406588	4406687	0.232558	0.508475	Aco018422.v3	upstream	R	4389227	4405661
10pm	CHH	LG01	4406688	4406787	0.34375	0.217949	Aco018422.v3	upstream	R	4389227	4405661
10am	CHH	LG04	15449966	15450065	0.787524	0.668776	Aco016862.v3	dwonstream	F	15446163	15448114
4am	CHH	LG04	15449998	15450097	0.754227	0.641855	Aco016862.v3	dwonstream	F	15446163	15448114
4pm	CHH	LG04	15450066	15450165	0.581325	0.474336	Aco016862.v3	dwonstream	F	15446163	15448114
4pm	CHH	LG06	11142624	11142723	0.768267	0.642222	Aco002739.v3	dwonstream	R	11144420	11153659
4am	CHH	LG06	11142654	11142753	0.704433	0.570142	Aco002739.v3	dwonstream	R	11144420	11153659
4pm	CHH	LG06	11142724	11142823	0.710907	0.580592	Aco002739.v3	dwonstream	R	11144420	11153659
4pm	CHH	LG06	11142824	11142923	0.656788	0.504257	Aco002739.v3	dwonstream	R	11144420	11153659
10pm	CHH	LG06	11142910	11143009	0.570916	0.463507	Aco002739.v3	dwonstream	R	11144420	11153659
4pm	CHH	LG06	11142924	11143023	0.582524	0.436757	Aco002739.v3	dwonstream	R	11144420	11153659
10pm	CHH	LG06	11143010	11143109	0.736889	0.579374	Aco002739.v3	dwonstream	R	11144420	11153659
4am	CHH	LG07	11969698	11969797	0.508982	0.298805	Aco018378.v3	upstream	F	11971604	11981479
10am	CHH	LG07	11969901	11970000	0.448276	0.25	Aco018378.v3	upstream	F	11971604	11981479
10am	CHH	LG07	11970201	11970300	0.398374	0.559091	Aco018378.v3	upstream	F	11971604	11981479
4pm	CHH	LG07	11970857	11970956	0.348684	0.541667	Aco018378.v3	upstream	F	11971604	11981479
4am	CHH	LG07	11970898	11970997	0.155979	0.304202	Aco018378.v3	upstream	F	11971604	11981479
10pm	CHH	LG07	11971001	11971100	0.0320513	0.165165	Aco018378.v3	upstream	F	11971604	11981479
4pm	CHH	LG07	11981557	11981656	0.532667	0.418908	Aco018378.v3	dwonstream	F	11971604	11981479
4pm	CHH	LG11	11867002	11867101	0.40631	0.282573	Aco005636.v3	upstream	R	11860303	11866459
10pm	CHH	LG11	11867004	11867103	0.375419	0.269955	Aco005636.v3	upstream	R	11860303	11866459
4pm	CHH	LG11	11868202	11868301	0.511468	0.343826	Aco005636.v3	upstream	R	11860303	11866459
4am	CHH	LG11	11868243	11868342	0.819858	0.662821	Aco005636.v3	upstream	R	11860303	11866459
4pm	CHH	LG11	11868302	11868401	0.881412	0.740385	Aco005636.v3	upstream	R	11860303	11866459
10pm	CHH	LG11	11868304	11868403	0.881509	0.752076	Aco005636.v3	upstream	R	11860303	11866459
4am	CHH	LG11	11868343	11868442	0.862448	0.726581	Aco005636.v3	upstream	R	11860303	11866459
4pm	CHH	LG11	11868402	11868501	0.791073	0.623838	Aco005636.v3	upstream	R	11860303	11866459
10pm	CHH	LG11	11868404	11868503	0.809392	0.652027	Aco005636.v3	upstream	R	11860303	11866459
10am	CHH	LG11	11868411	11868510	0.76908	0.663526	Aco005636.v3	upstream	R	11860303	11866459
4pm	CHH	LG11	9557502	9557601	0.22576	0.109189	Aco005368.v3	dwonstream	R	9559458	9564245
10pm	CHH	LG11	9557504	9557603	0.264789	0.123955	Aco005368.v3	dwonstream	R	9559458	9564245
4pm	CHH	LG11	9557602	9557701	0.619632	0.469619	Aco005368.v3	dwonstream	R	9559458	9564245
10pm	CHH	LG11	9557604	9557703	0.628329	0.466976	Aco005368.v3	dwonstream	R	9559458	9564245
4am	CHH	LG11	9557643	9557742	0.514344	0.324627	Aco005368.v3	dwonstream	R	9559458	9564245
4am	CHH	LG11	9557843	9557942	0.235294	0.122549	Aco005368.v3	dwonstream	R	9559458	9564245
10pm	CHH	LG11	9558004	9558103	0.472422	0.303318	Aco005368.v3	dwonstream	R	9559458	9564245
4am	CHH	LG11	9558043	9558142	0.427273	0.266816	Aco005368.v3	dwonstream	R	9559458	9564245
4pm	CHH	LG11	9558102	9558201	0.454094	0.284672	Aco005368.v3	dwonstream	R	9559458	9564245
4am	CHH	LG11	9558143	9558242	0.477273	0.265574	Aco005368.v3	dwonstream	R	9559458	9564245
10pm	CHH	LG11	9558204	9558303	0.508306	0.333333	Aco005368.v3	dwonstream	R	9559458	9564245
4pm	CHH	LG11	9558302	9558401	0.441327	0.266423	Aco005368.v3	dwonstream	R	9559458	9564245
4am	CHH	LG11	9558343	9558442	0.294271	0.170279	Aco005368.v3	dwonstream	R	9559458	9564245
4pm	CHH	LG11	9558402	9558501	0.280374	0.162791	Aco005368.v3	dwonstream	R	9559458	9564245
10pm	CHH	LG11	9558404	9558503	0.242424	0.0916031	Aco005368.v3	dwonstream	R	9559458	9564245
4pm	CHH	LG11	9558602	9558701	0.238095	0.119816	Aco005368.v3	dwonstream	R	9559458	9564245
4pm	CHH	LG11	9562502	9562601	0.315562	0.214286	Aco005368.v3	body	R	9559458	9564245
4am	CHH	LG11	9562543	9562642	0.30625	0.075	Aco005368.v3	body	R	9559458	9564245
4pm	CHH	LG11	9564402	9564501	0.195016	0.0842199	Aco005368.v3	upstream	R	9559458	9564245
10pm	CHH	LG11	9564404	9564503	0.237942	0.0993897	Aco005368.v3	upstream	R	9559458	9564245
10am	CHH	LG11	9564411	9564510	0.267857	0.162896	Aco005368.v3	upstream	R	9559458	9564245
4am	CHH	LG11	9564443	9564542	0.522876	0.341969	Aco005368.v3	upstream	R	9559458	9564245
4pm	CHH	LG11	9564502	9564601	0.715391	0.556263	Aco005368.v3	upstream	R	9559458	9564245
10pm	CHH	LG11	9564504	9564603	0.754292	0.592972	Aco005368.v3	upstream	R	9559458	9564245
10am	CHH	LG11	9564511	9564610	0.726937	0.536458	Aco005368.v3	upstream	R	9559458	9564245
4am	CHH	LG11	9564543	9564642	0.651072	0.369207	Aco005368.v3	upstream	R	9559458	9564245
4pm	CHH	LG11	9564602	9564701	0.609125	0.339798	Aco005368.v3	upstream	R	9559458	9564245
10pm	CHH	LG11	9564604	9564703	0.554986	0.327147	Aco005368.v3	upstream	R	9559458	9564245
10am	CHH	LG11	9564611	9564710	0.608295	0.384021	Aco005368.v3	upstream	R	9559458	9564245
4am	CHH	LG11	9564643	9564742	0.486575	0.23995	Aco005368.v3	upstream	R	9559458	9564245
4pm	CHH	LG11	9564702	9564801	0.422791	0.229255	Aco005368.v3	upstream	R	9559458	9564245
10am	CHH	LG11	9564711	9564810	0.406417	0.204611	Aco005368.v3	upstream	R	9559458	9564245
4am	CHH	LG11	9564743	9564842	0.428172	0.20901	Aco005368.v3	upstream	R	9559458	9564245
4pm	CHH	LG11	9564802	9564901	0.673451	0.535537	Aco005368.v3	upstream	R	9559458	9564245
10pm	CHH	LG11	9564804	9564903	0.728453	0.580478	Aco005368.v3	upstream	R	9559458	9564245
4pm	CHH	LG11	9564902	9565001	0.253994	0.141066	Aco005368.v3	upstream	R	9559458	9564245
4pm	CHH	LG11	9565502	9565601	0.219008	0.0962025	Aco005368.v3	upstream	R	9559458	9564245
10pm	CHH	LG11	9565504	9565603	0.234286	0.10285	Aco005368.v3	upstream	R	9559458	9564245
4pm	CHH	LG11	9566202	9566301	0.44012	0.291781	Aco005368.v3	upstream	R	9559458	9564245
4am	CHH	LG11	9566243	9566342	0.382226	0.233911	Aco005368.v3	upstream	R	9559458	9564245
10pm	CHH	LG14	1024331	1024430	0.597484	0.478697	Aco006606.v3	dwonstream	R	1026410	1030187
4pm	CHH	LG14	1024412	1024511	0.731025	0.589103	Aco006606.v3	dwonstream	R	1026410	1030187
10pm	CHH	LG14	1024431	1024530	0.662388	0.527869	Aco006606.v3	dwonstream	R	1026410	1030187
4pm	CHH	LG14	1024512	1024611	0.873333	0.705414	Aco006606.v3	dwonstream	R	1026410	1030187
10pm	CHH	LG14	1024531	1024630	0.849162	0.707057	Aco006606.v3	dwonstream	R	1026410	1030187
4pm	CHH	LG14	1600212	1600311	0.240099	0.0887701	Aco006528.v3	dwonstream	R	1601106	1609546
10am	CHH	LG14	1600240	1600339	0.577778	0.439815	Aco006528.v3	dwonstream	R	1601106	1609546
4pm	CHH	LG14	1600312	1600411	0.877852	0.769784	Aco006528.v3	dwonstream	R	1601106	1609546
10pm	CHH	LG14	1600331	1600430	0.749491	0.644444	Aco006528.v3	dwonstream	R	1601106	1609546
10am	CHH	LG14	1602240	1602339	0.226115	0.0906433	Aco006528.v3	body	R	1601106	1609546
4pm	CHH	LG14	1610812	1610911	0.687003	0.579609	Aco006528.v3	upstream	R	1601106	1609546
10am	CHH	LG14	1610940	1611039	0.516252	0.403226	Aco006528.v3	upstream	R	1601106	1609546
4pm	CHH	LG14	1611012	1611111	0.336779	0.235862	Aco006528.v3	upstream	R	1601106	1609546
10pm	CHH	LG14	1611031	1611130	0.218574	0.107009	Aco006528.v3	upstream	R	1601106	1609546
10am	CHH	LG14	1611040	1611139	0.220657	0.103943	Aco006528.v3	upstream	R	1601106	1609546
4pm	CHH	LG14	6565312	6565411	0.341463	0.16609	Aco024987.v3	dwonstream	R	6567358	6588908
4pm	CHH	LG14	6566112	6566211	0.524454	0.364974	Aco024987.v3	dwonstream	R	6567358	6588908
10pm	CHH	LG14	6566131	6566230	0.361891	0.258514	Aco024987.v3	dwonstream	R	6567358	6588908
4pm	CHH	LG14	6566612	6566711	0.293213	0.18407	Aco024987.v3	dwonstream	R	6567358	6588908
4pm	CHH	LG14	6566812	6566911	0.4514	0.305687	Aco024987.v3	dwonstream	R	6567358	6588908
10pm	CHH	LG14	6566831	6566930	0.442132	0.270139	Aco024987.v3	dwonstream	R	6567358	6588908
4am	CHH	LG14	6566912	6567011	0.510345	0.334898	Aco024987.v3	dwonstream	R	6567358	6588908
4pm	CHH	LG14	6569812	6569911	0.452776	0.320407	Aco024987.v3	body	R	6567358	6588908
4pm	CHH	LG14	6573912	6574011	0.226636	0.105405	Aco024987.v3	body	R	6567358	6588908
4am	CHH	LG14	6578312	6578411	0.515504	0.346847	Aco024987.v3	body	R	6567358	6588908
4am	CHH	LG14	6578412	6578511	0.391892	0.242424	Aco024987.v3	body	R	6567358	6588908
4am	CHH	LG14	6580412	6580511	0.597134	0.467818	Aco024987.v3	body	R	6567358	6588908
10am	CHH	LG14	6580440	6580539	0.302905	0.409664	Aco024987.v3	body	R	6567358	6588908
4pm	CHH	LG14	6582112	6582211	0.247392	0.126582	Aco024987.v3	body	R	6567358	6588908
10am	CHH	LG14	6582540	6582639	0.482213	0.666667	Aco024987.v3	body	R	6567358	6588908
4am	CHH	LG14	6583512	6583611	0.166667	0.0612245	Aco024987.v3	body	R	6567358	6588908
4pm	CHH	LG14	6584812	6584911	0.226994	0.113043	Aco024987.v3	body	R	6567358	6588908
4pm	CHH	LG14	6588912	6589011	0.653543	0.472561	Aco024987.v3	upstream	R	6567358	6588908
10pm	CHH	LG14	6588931	6589030	0.727053	0.523707	Aco024987.v3	upstream	R	6567358	6588908
4pm	CHH	LG14	6589012	6589111	0.528626	0.333333	Aco024987.v3	upstream	R	6567358	6588908
10pm	CHH	LG14	6589031	6589130	0.402866	0.273021	Aco024987.v3	upstream	R	6567358	6588908
4pm	CHH	LG14	6589112	6589211	0.490566	0.307692	Aco024987.v3	upstream	R	6567358	6588908
10pm	CHH	LG14	6589231	6589330	0.357357	0.195767	Aco024987.v3	upstream	R	6567358	6588908
4am	CHH	LG14	6589312	6589411	0.353868	0.230108	Aco024987.v3	upstream	R	6567358	6588908
10am	CHH	LG14	6590340	6590439	0.353066	0.240223	Aco024987.v3	upstream	R	6567358	6588908
4am	CHH	LG19	7821801	7821900	0.418919	0.302439	Aco008163.v3	dwonstream	R	7823200	7831853
4am	CHH	LG19	7821901	7822000	0.715217	0.594633	Aco008163.v3	dwonstream	R	7823200	7831853
4am	CHH	LG19	7832101	7832200	0.83195	0.726285	Aco008163.v3	upstream	R	7823200	7831853
4pm	CHH	LG19	7832116	7832215	0.795936	0.637652	Aco008163.v3	upstream	R	7823200	7831853
4am	CHH	LG19	7832201	7832300	0.685252	0.467993	Aco008163.v3	upstream	R	7823200	7831853
10am	CHH	LG19	7832216	7832315	0.662577	0.507937	Aco008163.v3	upstream	R	7823200	7831853
4am	CHH	LG19	7832301	7832400	0.657051	0.506226	Aco008163.v3	upstream	R	7823200	7831853
10am	CHH	LG19	7832316	7832415	0.656	0.500715	Aco008163.v3	upstream	R	7823200	7831853
4pm	CHH	LG19	7832416	7832515	0.556381	0.408596	Aco008163.v3	upstream	R	7823200	7831853
4am	CHH	LG19	7832501	7832600	0.287364	0.14604	Aco008163.v3	upstream	R	7823200	7831853
10pm	CHH	LG23	1994807	1994906	0.714286	0.490982	Aco007146.v3	upstream	R	1988940	1993967
10am	CHH	LG23	1994907	1995006	0.223602	0.0891089	Aco007146.v3	upstream	R	1988940	1993967
10pm	CHH	LG24	3919727	3919826	0.632911	0.46714	Aco020962.v3	upstream	F	3921744	3928761
4pm	CHH	LG24	3919745	3919844	0.664549	0.380493	Aco020962.v3	upstream	F	3921744	3928761
10am	CHH	LG24	3919753	3919852	0.637931	0.490338	Aco020962.v3	upstream	F	3921744	3928761
10pm	CHH	LG24	3919827	3919926	0.296834	0.177778	Aco020962.v3	upstream	F	3921744	3928761
10pm	CHH	LG24	3920027	3920126	0.813971	0.686806	Aco020962.v3	upstream	F	3921744	3928761
4pm	CHH	LG24	3920045	3920144	0.76524	0.585539	Aco020962.v3	upstream	F	3921744	3928761
10am	CHH	LG24	3920053	3920152	0.722871	0.574194	Aco020962.v3	upstream	F	3921744	3928761
10pm	CHH	LG24	3920127	3920226	0.590422	0.401769	Aco020962.v3	upstream	F	3921744	3928761
4pm	CHH	LG24	3920145	3920244	0.514397	0.324622	Aco020962.v3	upstream	F	3921744	3928761
4am	CHH	LG24	3920153	3920252	0.440217	0.288546	Aco020962.v3	upstream	F	3921744	3928761
4am	CHH	LG24	3920253	3920352	0.181362	0.0584718	Aco020962.v3	upstream	F	3921744	3928761
10pm	CHH	LG24	3920327	3920426	0.290006	0.170083	Aco020962.v3	upstream	F	3921744	3928761
4pm	CHH	LG24	3920345	3920444	0.456386	0.322433	Aco020962.v3	upstream	F	3921744	3928761
10am	CHH	LG24	3920353	3920452	0.462121	0.353201	Aco020962.v3	upstream	F	3921744	3928761
10pm	CHH	LG24	3920427	3920526	0.773946	0.562044	Aco020962.v3	upstream	F	3921744	3928761
4pm	CHH	LG24	3920445	3920544	0.737322	0.473436	Aco020962.v3	upstream	F	3921744	3928761
10am	CHH	LG24	3920453	3920552	0.653277	0.536481	Aco020962.v3	upstream	F	3921744	3928761
10pm	CHH	LG24	3920527	3920626	0.794788	0.561119	Aco020962.v3	upstream	F	3921744	3928761
4pm	CHH	LG24	3920545	3920644	0.796929	0.60359	Aco020962.v3	upstream	F	3921744	3928761
10am	CHH	LG24	3920553	3920652	0.801484	0.684564	Aco020962.v3	upstream	F	3921744	3928761
10am	CHH	LG24	3921353	3921452	0.124088	0.238839	Aco020962.v3	upstream	F	3921744	3928761
4am	CHH	LG24	3921553	3921652	0.782991	0.658038	Aco020962.v3	upstream	F	3921744	3928761
4pm	CHH	LG24	3930445	3930544	0.266263	0.159722	Aco020962.v3	dwonstream	F	3921744	3928761
